# Supplementary material for: What can urban mobility data reveal about the spatial distribution of infection in a single city?
Source: Springer Nature journal article supplement (doi:10.1186/s12889-019-6968-x), 2019-05-29
Supplement: MOESM1 [file 16758972]

## The spatial infection model

We assume that infection is acquired from individuals who are either asymptomatic or who have only mild symptoms, and who are therefore following their regular mobility patterns. In other words, the spatial distribution of infection results from the routine mobility patterns of susceptible and infectious individuals rather than, say, from susceptible individuals visiting non-mobile infectious individuals. We also assume that all individuals experience the same frequency and intensity of interactions, regardless of factors such as age.

While it is untrue that all infections are acquired from individuals with mild symptoms or no symptoms at all, recent evidence shows that influenza transmission can arise via aerosol transmission from normal breathing [1]—i.e., sneezing and coughing are not required for infection to occur. This highlights the role that mildly-symptomatic and asymptomatic individuals can play in the population experience of infection, especially since they are likely to adhere to their regular routines and their routine hygiene practices.

We define the force of infection in region  $i$  that is exerted by infectious individuals who reside in region  $j$  ( $\beta_{ij}$ ), the daily force of infection in region  $i$  ( $\Lambda_i$ ), and the daily force of infection vector ( $\Lambda$ ):

$$\beta_{ij} = \beta \cdot I_j \cdot M'_{j,i} \quad (1)$$

$$\Lambda_i = \sum_{j=1}^r \beta_{ij} \quad (2)$$

$$\Lambda = \beta \cdot \mathbf{I} \times M' \quad (3)$$

We then define a meta-population SEIR compartment model of infection with a mean latent period of  $1/\sigma$  and a mean infectious period of  $1/\gamma$ :

$$\frac{dS_i}{dt} = -\Lambda_i \cdot \frac{S_i}{N_i} \quad (4)$$

$$\frac{dE_i}{dt} = \Lambda_i \cdot \frac{S_i}{N_i} - \sigma E_i \quad (5)$$

$$\frac{dI_i}{dt} = \sigma E_i - \gamma I_i \quad (6)$$

$$\frac{dR_i}{dt} = \gamma I_i \quad (7)$$

We define the initial state to be fully-susceptible resident populations in each region, and introduce  $E_0$  exposed individuals into a randomly selection region  $\alpha$ :

$$\alpha \sim \mathcal{U}\{1, r\} \quad (8)$$

$$S_i(0) = \begin{cases} N_i & \text{if } i \neq \alpha \\ N_i - E_0 & \text{if } i = \alpha \end{cases} \quad (9)$$

$$E_i(0) = \begin{cases} 0 & \text{if } i \neq \alpha \\ E_0 & \text{if } i = \alpha \end{cases} \quad (10)$$

$$I_i(0) = R_i(0) = 0 \quad (11)$$

The absorbing states all satisfy the following condition:

$$\mathbf{E} = \mathbf{I} = 0 \quad (12)$$

In this model, infectious individuals move around the urban environment and due to their mixing patterns the force of infection can differ between regions:

$$\Lambda_i = \beta \left[ I_i \cdot \delta_i^H + \sum_{j \neq i} I_j \cdot \delta_j^* \cdot M'_{j,i} \right] \implies \Lambda_i \neq \Lambda_j$$

Accordingly, there is no simple expression for the epidemic final size in each patch [2, 3].

## Parameter values

| Parameter                   | Value                                                                                           |                                                      |
|-----------------------------|-------------------------------------------------------------------------------------------------|------------------------------------------------------|
| $R_0$                       | 1.4                                                                                             | Basic reproduction number                            |
| $\sigma$                    | 2.0                                                                                             | Inverse of incubation period                         |
| $\gamma$                    | 0.5                                                                                             | Inverse of infectious period                         |
| $\beta$                     | 0.7                                                                                             | Daily force of infection ( $R_0 \cdot \gamma$ )      |
| $E_0$                       | 10                                                                                              | Initial number of exposures                          |
| $\delta_i^H : i \in [1..r]$ | $\{\frac{1}{20}, \frac{2}{20}, \dots, \frac{18}{20}, \frac{19}{20}\}$                           | Fraction of infections that occur in the home region |
| $\delta_C$                  | $\{\frac{1}{5}, \frac{1}{4}, \frac{1}{3}, \frac{1}{2}, \frac{2}{3}, \frac{3}{4}, \frac{4}{5}\}$ | Fraction of mixing in CBD that involves residents    |
| $N_i$                       | varies                                                                                          | Region resident populations                          |

Table 1: Model parameter values.

| SA3   | Resident Population |
|-------|---------------------|
| 20601 | 91653               |
| 20602 | 55271               |
| 20603 | 70367               |
| 20604 | 148041              |
| 20605 | 108569              |
| 20606 | 67798               |
| 20607 | 94234               |
| 20701 | 177361              |
| 20702 | 95593               |
| 20703 | 107256              |
| 20801 | 102737              |
| 20802 | 157014              |
| 20803 | 122522              |
| 20804 | 43808               |
| 20901 | 127693              |
| 20902 | 99751               |
| 20903 | 68270               |
| 20904 | 224581              |
| 21001 | 61472               |
| 21002 | 30739               |
| 21003 | 79587               |
| 21004 | 40978               |
| 21005 | 169296              |
| 21101 | 160712              |
| 21102 | 27426               |
| 21103 | 114524              |
| 21104 | 63597               |
| 21105 | 154495              |
| 21201 | 97790               |
| 21202 | 137519              |
| 21203 | 176002              |
| 21204 | 197453              |
| 21205 | 184848              |
| 21301 | 196858              |
| 21302 | 88342               |
| 21303 | 87355               |
| 21304 | 160293              |
| 21305 | 233138              |

Table 2: The estimated resident population (ERP) for each SA3 in metropolitan Melbourne, 2016, as reported in ABS catalogue number 3218.0: “Regional Population Growth, Australia, 2016”.

## References

- [1] Yan J, Grantham M, Pantelic J, Bueno de Mesquita PJ, Albert B, Liu F, et al. Infectious virus in exhaled breath of symptomatic seasonal influenza cases from a college community. *Proceedings of the National Academy of Sciences*. 2018 Jan;.
- [2] Ma J, Earn DJD. Generality of the Final Size Formula for an Epidemic of a Newly Invading Infectious Disease. *Bulletin of Mathematical Biology*. 2006 Apr;68(3):679–702. Available from: <http://dx.doi.org/10.1007/s11538-005-9047-7>.
- [3] Miller JC. A note on the derivation of epidemic final sizes. *Bulletin of Mathematical Biology*. 2012 Sep;74:2125–2141.
